# Supplementary material for: Fluorescence recognition of double-stranded DNA based on the quenching of gold nanoparticles to a fluorophore labeled DNA probe
Source: Royal Society of Chemistry journal article supplement (doi:10.1039/c6an01145d), 2016-01-01
Supplement: c6an01145d1.pdf [file c6an01145d1.pdf]

# **Fluorescent recognition of double-stranded DNA based on the quenching of gold nanoparticles to fluorophore labeled DNA probe**

Xiangmin Miao,<sup>a\*,1</sup> Zongbing Li,<sup>a,1</sup> Liansheng Ling,<sup>b\*</sup>

<sup>a</sup>*School of Life Science, Jiangsu Normal University, Xuzhou 221116, P.R. China*

<sup>b</sup>*School of Chemistry and Chemical Engineering, Sun Yat-Sen University, Guangzhou 510275, PR China,*

## **Experimental**

### **CD measurement**

For the CD spectroscopy measurements, target dsDNA (5.0  $\mu\text{M}$ ), MB (5.0  $\mu\text{M}$ ) solution and the mixture of them (5.0  $\mu\text{M}$ ) were prepared in 20 mM of PBS buffer (pH 7.0, with 50 mM of NaCl). Subsequently, the samples were measured in a 0.1 cm path length cuvette by using a spectropolarimeter at RT. The average value of the spectra was recorded between 200 and 350 nm at a scanning rate of 50 nm/min, with a response time of 1.0 s and a bandwidth of 1.0 nm.

### **Samples preparation for TEM images and DLS analysis**

For TEM images, the AuNPs and DNA-AuNPs probe samples (20  $\mu\text{L}$ ) were dropped onto a carbon-coated copper grid. Then, the samples were kept and dried in a desiccator prior to use. For DLS analysis, 20  $\mu\text{L}$  of AuNPs and DNA-AuNPs probe were diluted to 200  $\mu\text{L}$  respectively. The sizes of AuNPs reported were based on the number average, and each reported particle size was the average of three measurements.

**Table S1** Sequence of different oligonucleotides

| Name                              | Sequence (5'-3')                                                               |
|-----------------------------------|--------------------------------------------------------------------------------|
| MB                                | TCAGCTGCGAGTTCTTTCTTTCTTCCTCCCTCGCA                                            |
| DP                                | FAM-GCTGCAGCTGAGAGC-(CH <sub>2</sub> ) <sub>3</sub> -SH                        |
| Target dsDNA (T)                  | AAGAAAGAAAGAAGGAGG (Ta)<br>CCTTCTTCTTTCTTTCTT (Tb)                             |
| Control dsDNA 1 (T <sub>1</sub> ) | AAGGAAGAAAGAAGGAGG (T <sub>1</sub> a)<br>CCTCCTTCTTTCTTCCTT (T <sub>1</sub> b) |
| Control dsDNA 2 (T <sub>2</sub> ) | AAGGAAGAAAGGAGGAGG (T <sub>2</sub> a)<br>CCTCCTCCTTTCTTCCTT (T <sub>2</sub> b) |

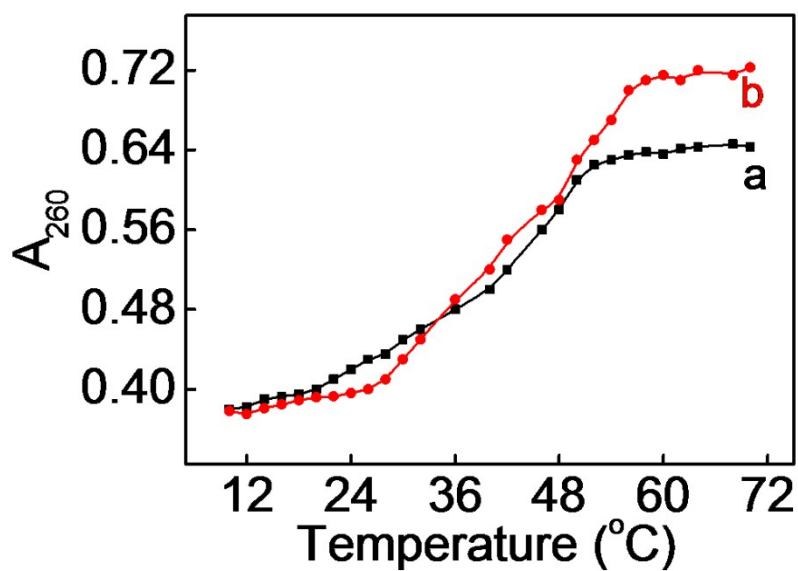

**Fig. S1** Melting curves of triplex DNA in the absence (a) and presence (b) of Ag<sup>+</sup>.

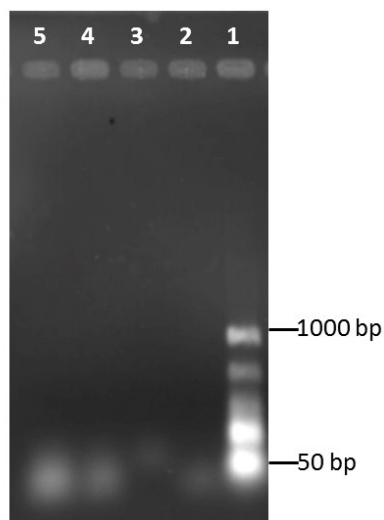

**Fig. S2** Gel analysis of 4  $\mu\text{M}$  of DNA strands: 1) DNA marker, 2) DNA probe that used for AuNPs modification, 3) MB/dsDNA/DNA probe, 4) dsDNA and 5) MB.

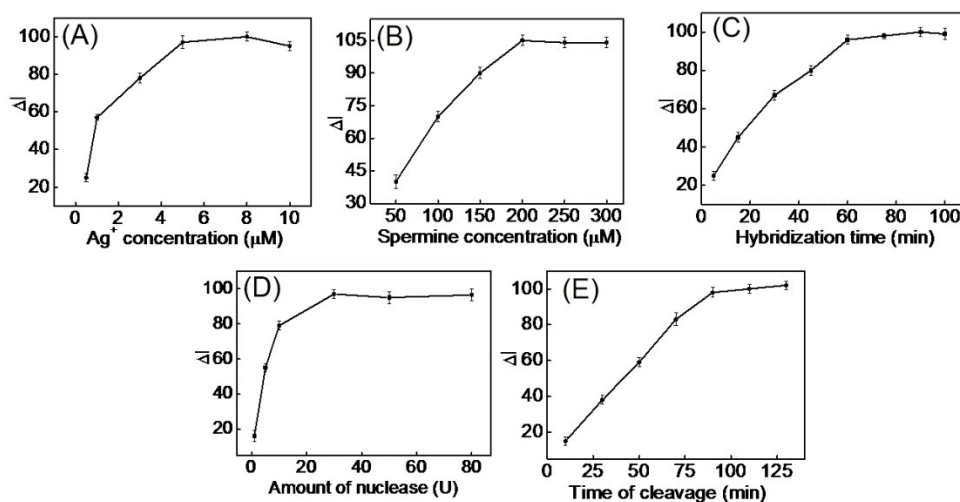

**Fig. S3** Effect of  $\text{Ag}^+$  concentration (A), spermine concentration (B), the hybridization time between MB and dsDNA (C), the amount of nicking nuclease (D) and the cleavage time of DNA-AuNPs probe (E). Experiments were conducted in 20 mM of PBS buffer (pH 7.0, with 50 of mM NaCl).

**Table S2** Recovery detection of dsDNA in serum samples

| Serum samples | Added<br>(nM) | Found<br>(nM) | Recovery<br>(%) | RSD<br>(%) |
|---------------|---------------|---------------|-----------------|------------|
| 1             | 0.5           | 0.53          | 106             | 2.76       |
| 2             | 1.0           | 0.96          | 96              | 3.81       |
| 3             | 1.5           | 1.46          | 97.3            | 2.83       |
